# Supplementary material for: Slider-crank mechanism in a molecular crystal: conversion of linear thermal expansion of a lattice to circular rotation of a coordination chain
Source: Royal Society of Chemistry journal article supplement (doi:10.1039/d2ce00768a), 2022-01-01
Supplement: d2ce00768a1.pdf [file d2ce00768a1.pdf]

# ESI

## **Slider-crank Mechanism in a Molecular Crystal: Conversion of Linear Thermal Expansion of Lattice to Circular Rotation of Coordination Chain**

Ryo Tsunashima, Naomi Fujikawa, Misaki Shiga, Sayu Miyagawa, Shiori Ohno, Atsuko Masuya-Suzuki,<sup>□</sup>Tomoyuki Akutagawa,<sup>□</sup>Kiyonori Takahashi, Takayoshi Nakamura and Sadafumi Nishihara.

### Contents

1. Experimental Procedures
  - 1-1. Spectroscopic studies.
  - 1-2. Single-crystal X-ray diffraction analysis
2. DSC
3. Crystallographic analysis

## 1. Experimental Procedures

### 1-1. Spectroscopic studies.

Single crystals of **1** was obtained by slow diffusion. Solution A was slowly layered on solution B. After 1-2 weeks of slow diffusion, blueish columnar single crystals were obtained (Figure S1); yield 19.3% based on Co.

Solution A; 0.1 M of dabco in MeOH

Solution B; 0.1 M of  $\text{Co}(\text{NO}_3)_2 \cdot 6\text{H}_2\text{O}$  and 0.2 M of KOCN om  $\text{H}_2\text{O}:\text{MeOH}=1:1$  mixed solution

Elemental analysis; found: C 32.001, H 3.715, N 20.834 and calc C 32.15, H 3.60, N 20.83 for  $\text{KCo}(\text{C}_6\text{H}_{12}\text{N}_2)(\text{OCN})_3$

FTIR ( $\text{cm}^{-1}$ ): 2231 (s), 1323 (m), 1057(m), 997(w), 918(w), 843(w), 793(m), 611(m)

Uv-vis-NIR ( $\text{cm}^{-1}$ ): 19474, 17873, 16821, 11834

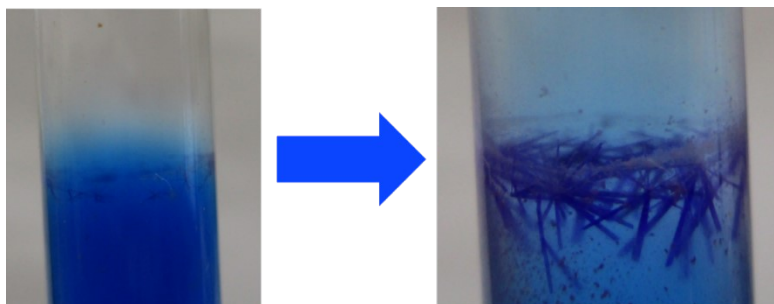

**Figure S1.** Photos before and after crystallization.

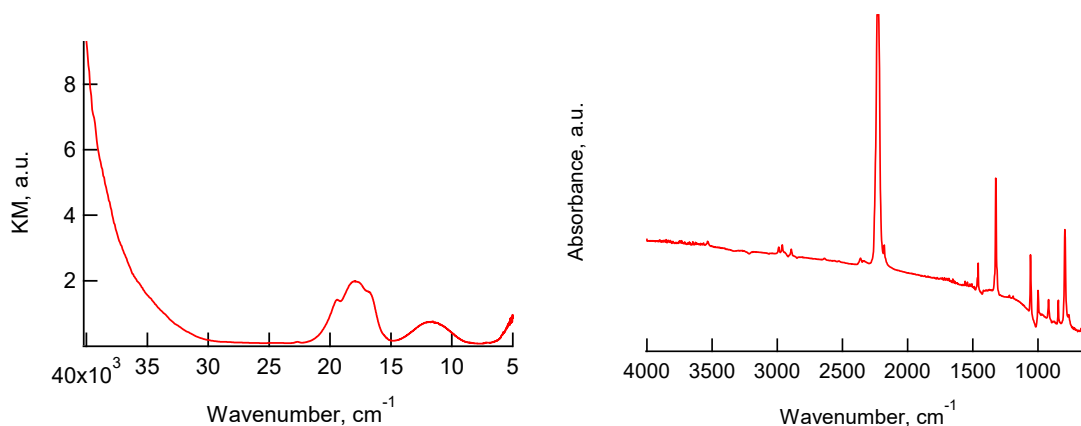

**Figure S2.** UV-vis-NIR (left) and IR (right) spectra of crystal **1**.

## 1-2. Single-crystal X-ray diffraction analysis

Single-crystal analysis of **1**;

135 K, CCDC 2159526

187 K, CCDC 2159527

239 K, CCDC 2159525

303 K, CCDC 2159523

342 K, CCDC 2159522

390 K, CCDC 2159528

446 K, CCDC 2159524

A suitable crystal  $0.29 \times 0.27 \times 0.22$  mm<sup>3</sup> was selected and mounted on a suitable support on an XtaLAB Synergy R, HyPix diffractometer. The crystal was kept at a steady temperature during data collection. The structure was solved with the ShelXT 2018/2 structure solution program using the Intrinsic Phasing solution method and by using Olex2 as the graphical interface. The model was refined with version 2018/3 of ShelXL 2018/3 using Least Squares minimisation. Further details of the crystallographic analysis are summarised in the CIF file deposited at the CCDC. Crystallographic parameters were summarized in Table S1.

**Table S1.** Summary of crystallographic data.

| CCDC#                       | 2159526                                                         | 2159527               | 2159525               | 2159523               | 2159522               | 2159528               | 2159524                              |
|-----------------------------|-----------------------------------------------------------------|-----------------------|-----------------------|-----------------------|-----------------------|-----------------------|--------------------------------------|
| Formula                     | C <sub>9</sub> H <sub>12</sub> CoKN <sub>5</sub> O <sub>3</sub> |                       |                       |                       |                       |                       |                                      |
| $D_{calc}/g\text{ cm}^{-3}$ | 1.687                                                           | 1.674                 | 1.660                 | 1.642                 | 1.629                 | 1.602                 | 1.584                                |
| $m/\text{mm}^{-1}$          | 1.622                                                           | 1.609                 | 1.595                 | 1.578                 | 1.566                 | 1.540                 | 1.522                                |
| Formula Weight              | 336.27                                                          |                       |                       |                       |                       |                       |                                      |
| Colour                      | violet                                                          |                       |                       |                       |                       |                       |                                      |
| Shape                       | block                                                           |                       |                       |                       |                       |                       |                                      |
| Size/ $\text{mm}^3$         | 0.29×0.27×0.22                                                  |                       |                       |                       |                       |                       |                                      |
| $T/\text{K}$                | 135                                                             | 187                   | 239                   | 303                   | 242                   | 390                   | 446                                  |
| Crystal System              | hexagonal                                                       |                       |                       |                       |                       |                       |                                      |
| Flack Parameter             | 0.01(2)                                                         | 0.02(3)               | 0.000(17)             | 0.04(3)               | 0.01(2)               | 0.00(4)               | -                                    |
| Hoof Parameter              | 0.004(15)                                                       | -0.00(2)              | -0.014(14)            | 0.04(2)               | 0.01(2)               | 0.03(3)               | -                                    |
| Space Group                 | <i>P</i> -62 <i>c</i>                                           | <i>P</i> -62 <i>c</i> | <i>P</i> -62 <i>c</i> | <i>P</i> -62 <i>c</i> | <i>P</i> -62 <i>c</i> | <i>P</i> -62 <i>c</i> | <i>P</i> 6 <sub>3</sub> / <i>mmc</i> |
| $a/\text{Å}$                | 10.3499(5)                                                      | 10.3782(6)            | 10.4110(7)            | 10.4530(5)            | 10.4730(10)           | 10.5556(6)            | 10.6103(12)                          |
| $c/\text{Å}$                | 7.1351(4)                                                       | 7.1530(4)             | 7.1669(4)             | 7.1875(3)             | 7.2162(6)             | 7.2239(3)             | 7.2328(6)                            |
| $V/\text{Å}^3$              | 661.92(7)                                                       | 667.21(9)             | 672.75(10)            | 680.13(7)             | 685.46(14)            | 697.06(8)             | 705.17(17)                           |
| $Z$                         | 2                                                               |                       |                       |                       |                       |                       |                                      |
| Wavelength/Å                | 0.71073                                                         |                       |                       |                       |                       |                       |                                      |
| Radiation type              | Mo $K_{\alpha}$                                                 |                       |                       |                       |                       |                       |                                      |
| Measured Refl.              | 5956                                                            | 6158                  | 6166                  | 4236                  | 3914                  | 4706                  | 1136                                 |
| Independent Refl.           | 643                                                             | 670                   | 670                   | 605                   | 603                   | 618                   | 340                                  |
| Reflections with $I > 2(I)$ | 603                                                             | 593                   | 598                   | 503                   | 520                   | 495                   | 292                                  |
| $R_{int}$                   | 0.0711                                                          | 0.1259                | 0.0470                | 0.0558                | 0.0468                | 0.1077                | 0.0442                               |
| Parameters                  | 35                                                              | 36                    | 36                    | 36                    | 36                    | 35                    | 30                                   |
| Restraints                  | 0                                                               | 0                     | 0                     | 0                     | 0                     | 0                     | 0                                    |
| Largest Peak                | 0.217                                                           | 0.311                 | 0.346                 | 0.188                 | 0.215                 | 0.402                 | 0.20                                 |
| Deepest Hole                | -0.312                                                          | -0.296                | -0.445                | -0.233                | -0.182                | -0.405                | -0.27                                |
| GooF                        | 0.710                                                           | 1.086                 | 1.138                 | 1.097                 | 1.072                 | 1.005                 | 1.092                                |
| $wR_2$ (all data)           | 0.0834                                                          | 0.0747                | 0.0680                | 0.0682                | 0.0743                | 0.1259                | 0.0873                               |
| $wR_2$                      | 0.0814                                                          | 0.0725                | 0.0665                | 0.0648                | 0.0715                | 0.1161                | 0.0839                               |
| $R_1$ (all data)            | 0.0282                                                          | 0.0352                | 0.0317                | 0.0374                | 0.0350                | 0.0574                | 0.0321                               |
| $R_1$                       | 0.0261                                                          | 0.0300                | 0.0274                | 0.0279                | 0.0288                | 0.0452                | 0.0284                               |

## 2. DSC

DSC was shown in Figure S1 measured at different scan rate and cycle measurement at 15 K min<sup>-1</sup>. Transition temperature, differential enthalpy and entropy were summarized in table S1. Differential entropy 5.5 J K<sup>-1</sup> mol<sup>-1</sup> was well agree with 5.76 J K<sup>-1</sup> mol<sup>-1</sup> (=Rln2) for order disorder type transition.

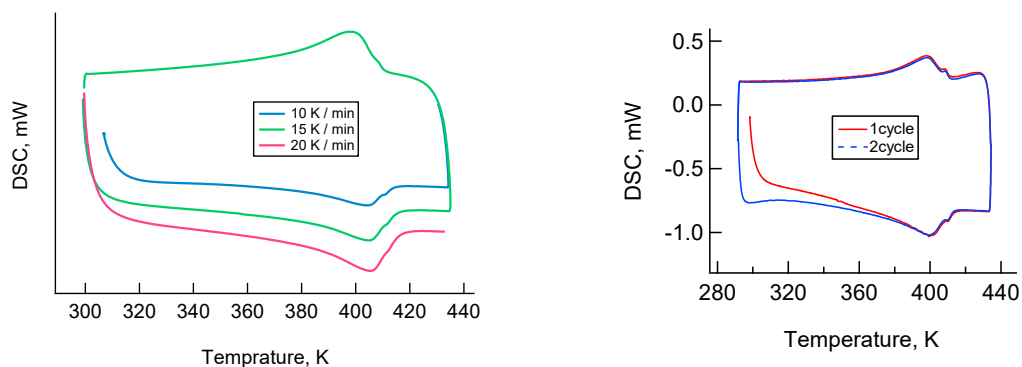

**Figure S3.** DSC (left) of compound **1**.

**Table S2.** Transition temperature ( $T_c$ ), differential enthalpy ( $\Delta H$ ) and entropy ( $\Delta S$ )<sup>[a]</sup>

|             | $T_c$ , K | $\Delta H$ , kJ<br>mol <sup>-1</sup> | $\Delta S$ , J K <sup>-1</sup><br>mol <sup>-1</sup> |
|-------------|-----------|--------------------------------------|-----------------------------------------------------|
| Heating run | 400       | -2.2                                 | 5.5                                                 |
| Cooling run | 398       | -1.7                                 | 4.3                                                 |

[a] differential entropy was estimated using equation of  $\Delta S = -\Delta H/T_c$ .

### 3. Crystallographic analysis

Figure S4 is plots of unit cell parameters and volume against temperature. Structural evolution is continuous against increases in temperature. From the temperature dependence of the lattice parameter  $a$  and  $c$  as well as distance between  $K^+$  and  $Co^{2+}$ , thermal expansion coefficients  $\alpha_a$ ,  $\alpha_c$ , and  $\alpha_x$  were determined, respectively (Table S3).

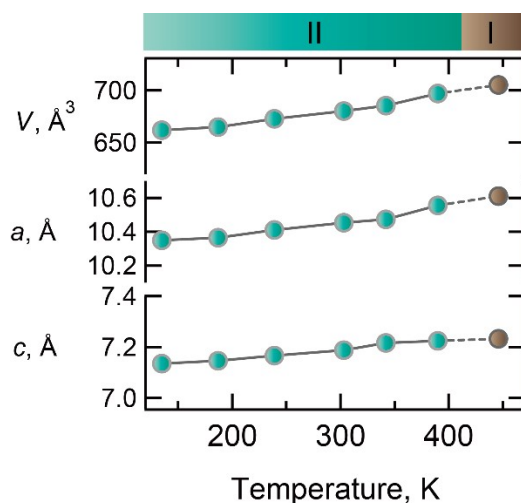

**Figure S4.** Plots of unit cell parameters and volume against temperature.

**Table S3.** Thermal expansion coefficient estimated for lattice parameter  $a$  ( $\alpha_a$ ) and  $c$  ( $\alpha_c$ ) as well as distance between  $K^+$  and  $Co^{2+}$  ( $\alpha_x$ ).

|                                       | 135 K   | 187 K   | 239 K  | 303 K  | 342 K  | 390 K   | 446 K   |
|---------------------------------------|---------|---------|--------|--------|--------|---------|---------|
| $x$ , $\text{\AA}$                    | 5.975   | 5.992   | 6.011  | 6.035  | 6.047  | 6.094   | 6.126   |
| $\alpha_x$ , $10^{-5} \text{ K}^{-1}$ | -       | 5.78    | 6.17   | 5.79   | 11.2   | 12.5    | -       |
| $a$ , $\text{\AA}$                    | 10.3499 | 10.3652 | 10.411 | 10.453 | 10.473 | 10.5556 | 10.6103 |
| $\alpha_a$ , $10^{-5} \text{ K}^{-1}$ | -       | 5.67    | 7.27   | 5.76   | 11.3   | 12.5    | -       |
| $c$ , $\text{\AA}$                    | 7.1351  | 7.1467  | 7.1669 | 7.1875 | 7.2162 | 7.2239  | 7.2328  |
| $\alpha_c$ , $10^{-5} \text{ K}^{-1}$ | -       | 7.28    | 7.91   | 6.66   | 5.80   | 2.21    | -       |

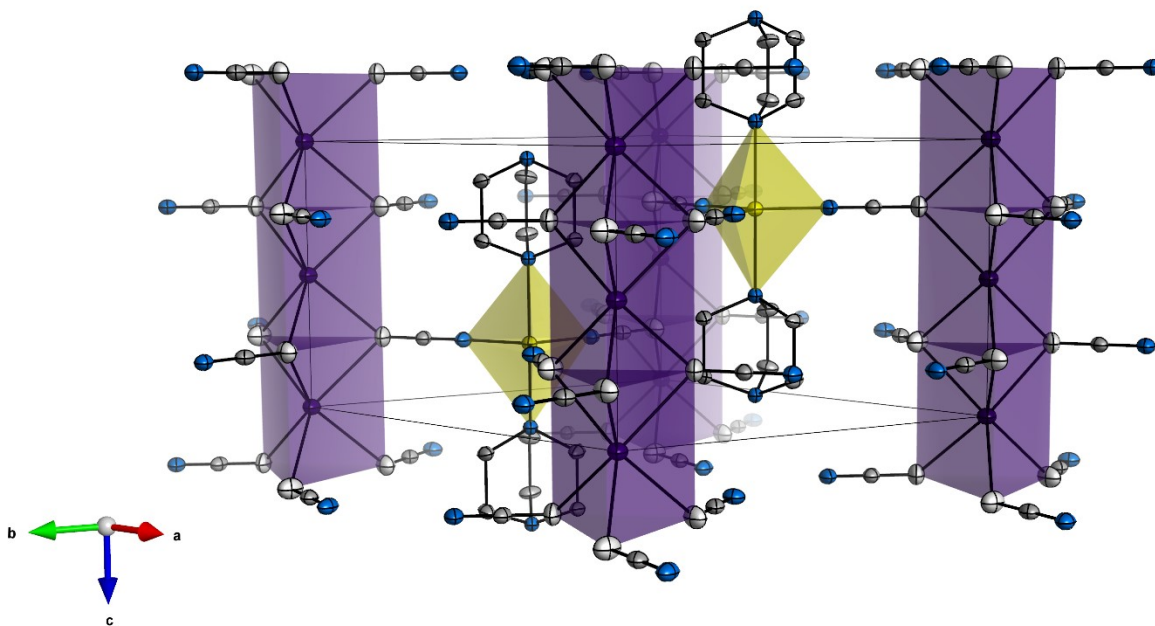

**Figure S5.** Packing structure at 135 K (thermal ellipsoid: 50 % of probability).

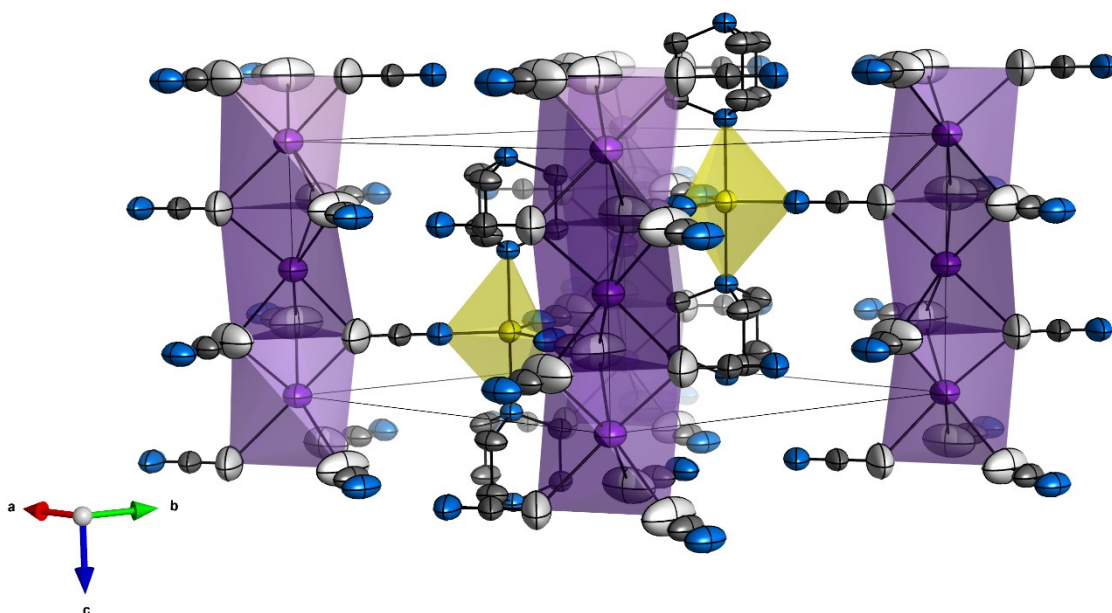

**Figure S6.** Packing structure at 390 K (thermal ellipsoid: 50 % of probability).

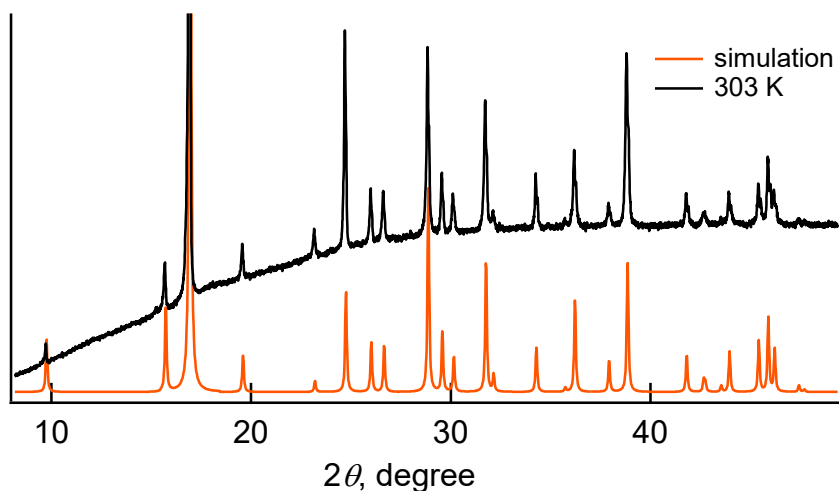

**Figure S7.** Powder X-ray diffraction pattern at 303 K.

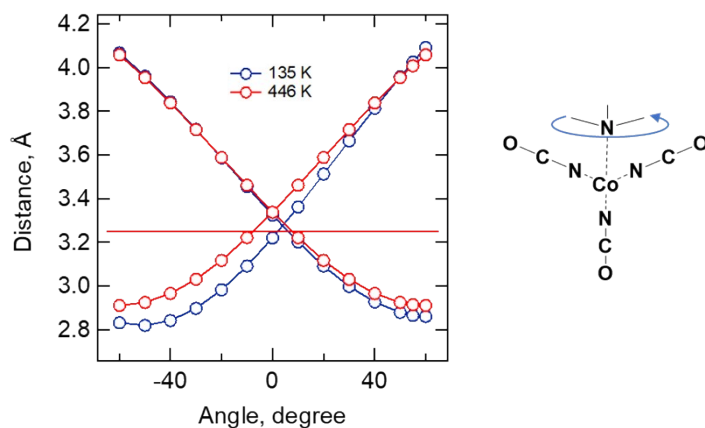

**Figure S8.** Plot of distances between C of dabco and N of  $\text{OCN}^-$  against angle by which dabco molecule was rotated with coordination bonds constant (data at 135 K (blue) and 446 K (red)). At both temperature, distances were lowered below the sum of vdW radii 3.25 Å (red line) when orientational angle of dabco and cyanate triangle differed above  $\sim 10^\circ$ , indicating correlated rotational motion is originated from steric hindrance. This is probably an origin for why N atoms are not thermally disordered at the phase-I.



**Table S4.** Summary of interatomic distances in cyanate. In the crystal **1**, bond length of N-C and C-O of cyanate differs. This type of structure suggests  $\text{N}\equiv\text{C}-\text{O}^-$  rather than  $^-\text{N}=\text{C}=\text{O}$ . Coordination Co-N-C is almost linear, which is compatible with approximate  $sp$  hybridization of the N atom in  $\text{N}\equiv\text{C}-\text{O}^-$ . Negative charge is considered to be located on O atom.

| Compound                  | $d(\text{N}-\text{C}), \text{\AA}$ | $d(\text{C}-\text{O}), \text{\AA}$ | Method                                        | ref       |
|---------------------------|------------------------------------|------------------------------------|-----------------------------------------------|-----------|
| $\text{NCO}^-$            | 1.17(1)                            | 1.26(1)                            | Photoelectron spectra at gas phase            | 1         |
| $(\text{NH}_4)\text{NCO}$ | 1.191(5)                           | 1.215(5)                           | Neutron powder diffraction experiment at 14 K | 2         |
| $\text{AgNCO}$            | 1.195(11)                          | 1.180(11)                          | Single crystal X-ray diffraction              | 3         |
| <b>1</b>                  | 1.163(4)                           | 1.216(4)                           | Single crystal X-ray diffraction              | This work |

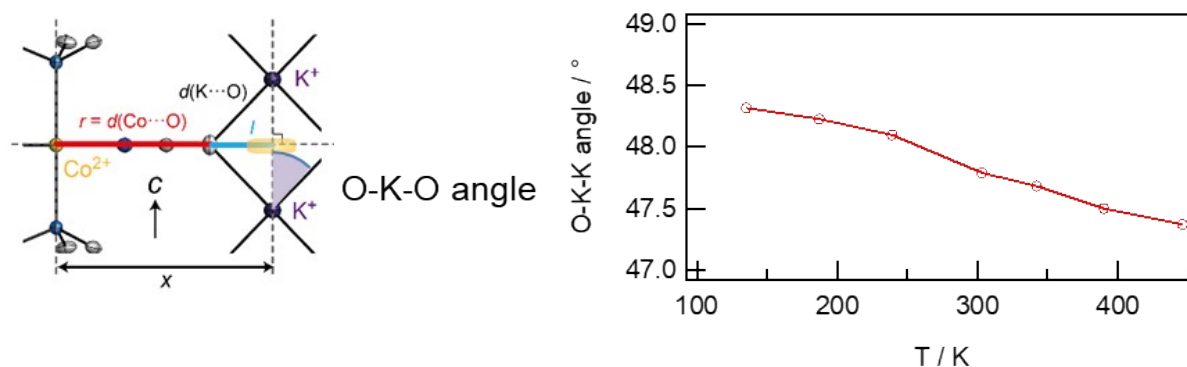

**Figure S9.** Definition and temperature dependence of O-K-O angle.

## References

- [1] S. E. Bradforth, E. H. Kim, D. W. Arnold, and D. M. Neumark. *J. Chem. Phys.*, 98, 800.
- [2] E. J. MacLean, K. D. M. Harris, B. M. Kariuki, S. J. Kitchin, R. R. Tykwinski, I. P. Swainson, J. D. Dunitz, *J. Am. Chem. Soc.* **2003**, 125, 14449–14451.
- [3] D. Britton, J. D. Dunitz, *Acta Crystallogr.* **1965**, 18, 424–428.
